# Supplementary material for: Targeted graphene oxide for drug delivery as a therapeutic nanoplatform against Parkinson's disease
Source: Royal Society of Chemistry journal article supplement (doi:10.1039/d0bm01765e), 2020-12-16
Supplement: d0bm01765e1.pdf [file d0bm01765e1.pdf]

Supplementary Material

**Targeted Graphene Oxide for Drug Delivery as a Therapeutic  
Nanoplatfom against Parkinson's Disease**

Sha Xiong<sup>a</sup>, Jingshan Luo<sup>a</sup>, Qun Wang<sup>a</sup>, Zhongjun Li<sup>b</sup>, Juntong Li<sup>a</sup>, Qiao Liu<sup>c</sup>, Liqian Gao<sup>d</sup>, Shuhuan Fang<sup>a</sup>, Yunyong Li<sup>e</sup>, Huafeng Pan<sup>a</sup>, Hong Wang<sup>a</sup>, Yongbin Zhang<sup>a</sup>, Qi Wang<sup>a\*</sup>, Xiaojia Chen<sup>c\*</sup>, Tongkai Chen<sup>a\*</sup>

*<sup>a</sup> Science and Technology Innovation Center, Guangzhou University of Chinese  
Medicine, Guangzhou 510405, China*

*<sup>b</sup> Department of Neurosurgery, Shenzhen Key Laboratory of Neurosurgery, the First  
Affiliated Hospital of Shenzhen University/Shenzhen Second People's Hospital,  
Shenzhen University, Shenzhen 518035, China*

*<sup>c</sup> State Key Laboratory of Quality Research in Chinese Medicine, Institute of Chinese  
Medical Sciences, University of Macau, Macau 999078, China*

*<sup>d</sup> School of Pharmaceutical Sciences (Shenzhen), Sun Yat-sen University, Shenzhen  
518107, China*

*<sup>e</sup> School of Materials and Energy, Guangdong University of Technology, Guangzhou  
510006, China*

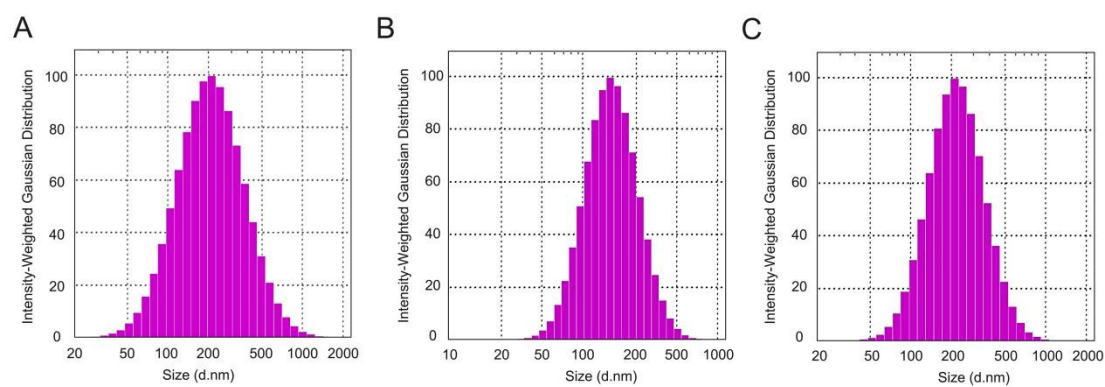

Fig. S1 (A-C) Particle size distribution of PEG-GO, GO-Pue and Lf-GO-Pue, respectively.

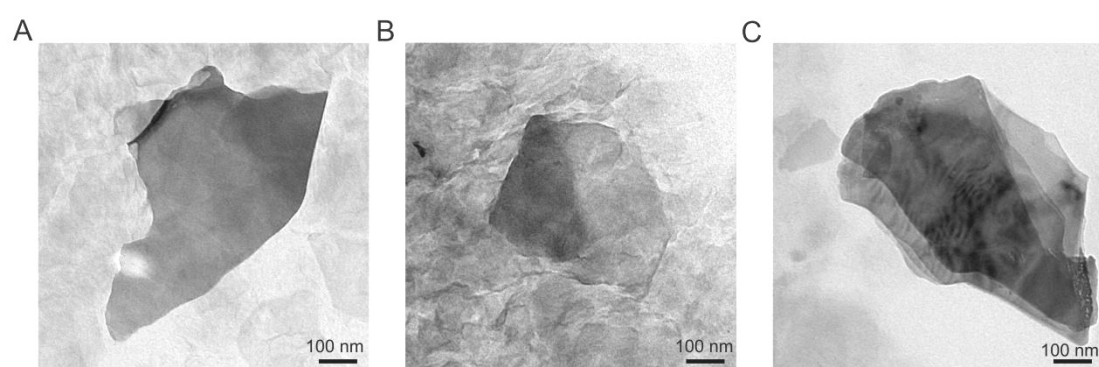

Fig. S2 (A-C) TEM image of PEG-GO, GO-Pue and Lf-GO-Pue, respectively.

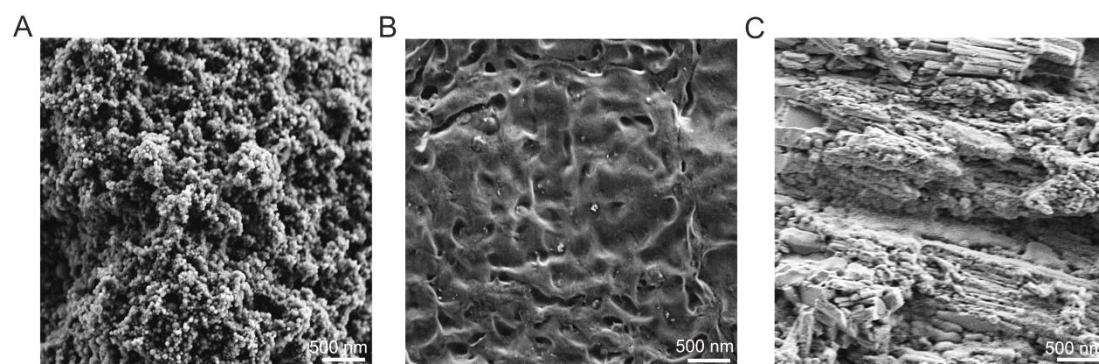

Fig. S3 (A-C) SEM image of PEG-GO, GO-Pue and Lf-GO-Pue, respectively.

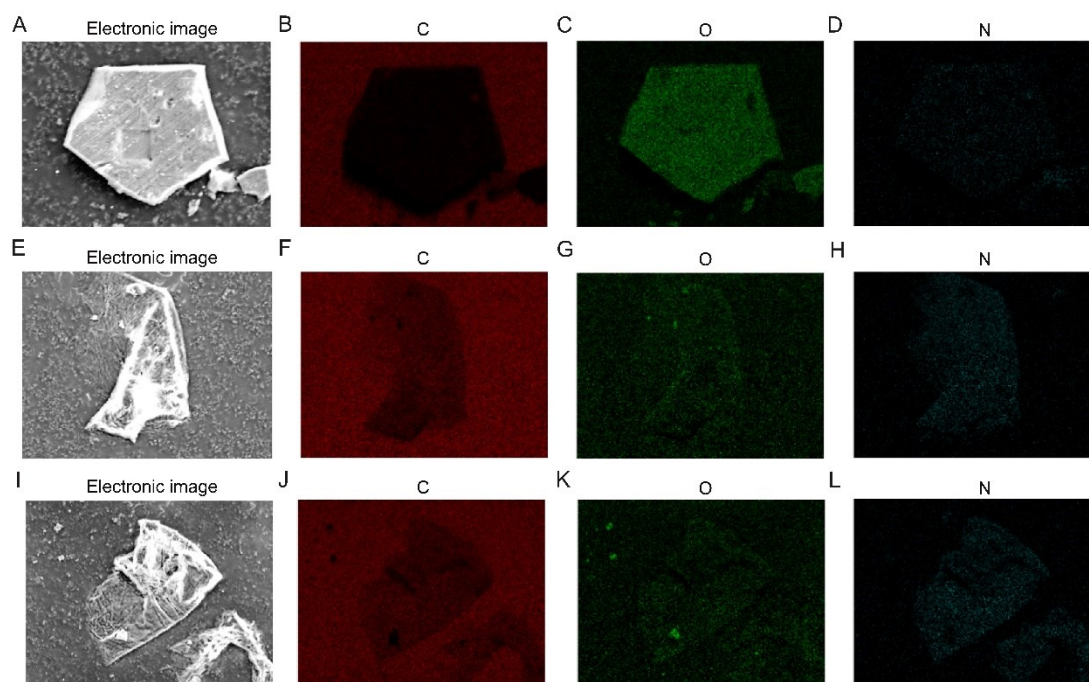

Fig. S4 (A) STEM image of PEG-GO. (B-D) C, O and N element mapping from A, respectively. (E) STEM image of GO-Pue. (F-H) C, O and N element from E, respectively. (I) STEM image of Lf-GO-Pue. (J-L) C, O and N element from I, respectively.

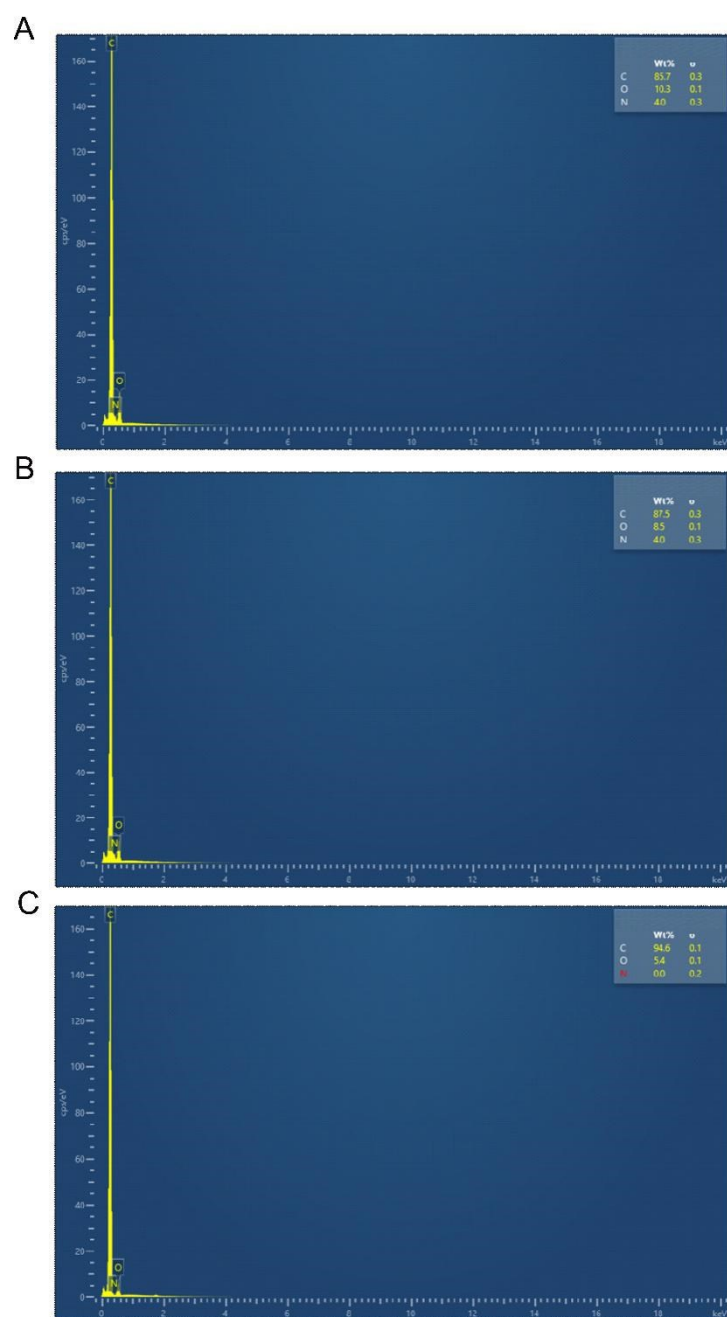

Fig. S5 (A-C) EDS spectra of PEG-GO, GO-Pue and Lf-GO-Pue, respectively.

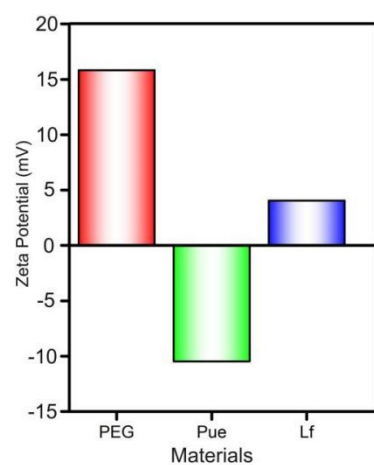

Fig. S6 Zeta potential values of PEG, Pue and Lf.

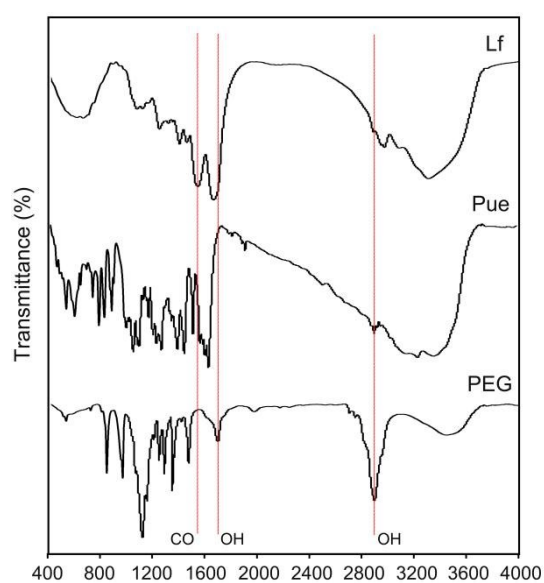

Fig. S7 FTIR spectra of PEG, Pue and Lf.

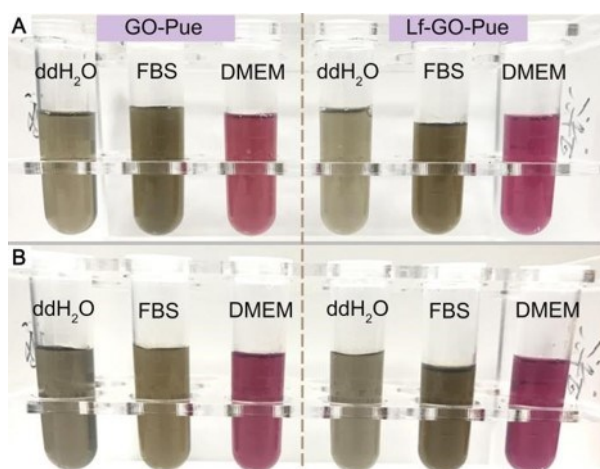

Fig. S8 The stability of GO-Pue and Lf-GO-Pue in different media at different time points. (A) 0 h, (B) 24 h.

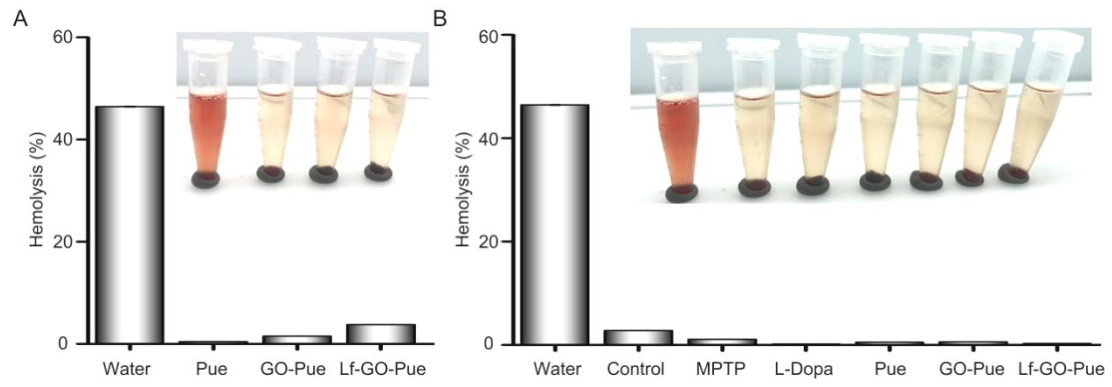

Fig. S9 Hemolysis assay in two different *in vivo* tests. (A) *In vivo* targeted test. (B) *In vivo* anti-PD pharmacodynamics evaluation.
